# Supplementary material for: Anticancer Activity of Diosgenin and Its Molecular Mechanism
Source: Springer Nature journal article supplement (doi:10.1007/s11655-023-3693-1), 2023-03-20
Supplement: MOESM1 [file 11655_2023_3693_MOESM1_ESM.pdf]

Appendix 1. Antitcancer mechanism of diosgenin.

| Source                                                             | Cells/Animals/Viruses/Bacteria                                                             | Dose                               | Main effects/pathways                                                                                                                                                                                                                                              | Pharmacological action                                                                                | Reference |
|--------------------------------------------------------------------|--------------------------------------------------------------------------------------------|------------------------------------|--------------------------------------------------------------------------------------------------------------------------------------------------------------------------------------------------------------------------------------------------------------------|-------------------------------------------------------------------------------------------------------|-----------|
| Sigma Co. (Madrid, Spain)                                          | human squamous carcinoma cell line PE/CA-PJ15                                              | 5, 25, 50, 100 $\mu$ M             | boosting the G2/M phase to the detriment of the S phase                                                                                                                                                                                                            | reducing cell viability, increasing apoptosis, inhibiting cell migration and modifying the cell cycle | (22)      |
| Sigma-Aldrich Chemicals Pvt. Ltd., Bangalore, India                | eight to ten weeks old male golden Syrian hamsters (Mesocricetus auratus) weighing 80–120g | 80 mg/kg                           | reducing the tumor incidence, reducing pathological changes, enhancing the process of conjugation and modulation of carcinogen metabolizing enzymes and subsequent elimination of carcinogenic metabolites, decreasing the levels of plasma and erythrocytes TBARS | antioxidant and antilipidperoxidative potential                                                       | (23)      |
| Sigma-Aldrich (S8534)                                              | human esophageal Eca109 cell line                                                          | 50 $\mu$ g/mL                      | inhibiting p38 protein                                                                                                                                                                                                                                             | inhibiting cancer cell proliferation, regulating cell migration and invasion                          | (25)      |
| Sigma-Aldrich (purity $\geq$ 98%)                                  | human gastric cancer cells BGC-823, MGC-803                                                | 0-20 $\mu$ M                       | inhibiting both mRNA and protein expression of MESP1                                                                                                                                                                                                               | inhibiting the proliferation of gastric cancer cells                                                  | (26)      |
| \                                                                  | NCI-N87, HGC-27, MGC80-3, SGC-7901 and BGC-823                                             | 10 $\mu$ M                         | being related to E-cadherin, integrin $\alpha$ 5 and integrin $\beta$ 6                                                                                                                                                                                            | inhibiting cancer cell invasion and survival                                                          | (27)      |
| Sigma-Aldrich (St. Louis, MO, USA)                                 | AGS and SGC-7901                                                                           | 0, 1, 2, 4, 8, 16, 32 $\mu$ M      | arresting G0/G1 phase, inhibiting Rho/ROCK signaling                                                                                                                                                                                                               | impairing cell proliferation, increasing cell apoptosis                                               | (29)      |
| Qi Ling decoction (QLD)                                            | BGC-823 and SGC-7901                                                                       | 0.01-10 $\mu$ g/mL                 | inhibiting MMP-9 and affecting the PI3K/Akt signaling pathway                                                                                                                                                                                                      | inhibiting the invasion, migration, and adhesion of cancer cells                                      | (2)       |
| Fenugreek seeds (Agriculture and Agro-Food Canada Research Center, | human colon cancer cells HT-29                                                             | 0, 20, 40, 60, 80, 100 $\mu$ mol/L | inhibiting bcl-2 and inducing caspase-3 protein expression                                                                                                                                                                                                         | inhibiting cell growth and inducing apoptosis                                                         | (33)      |
|                                                                    | Seven-week-old male F344                                                                   | 1%                                 | reducing or retarding the appearance of colonic aberrant crypt                                                                                                                                                                                                     | preventing cancer                                                                                     |           |

|                                                                     |                                                                  |                                                  |                                                                                                                                                                                                                                                                                                 |                                                                                                       |            |
|---------------------------------------------------------------------|------------------------------------------------------------------|--------------------------------------------------|-------------------------------------------------------------------------------------------------------------------------------------------------------------------------------------------------------------------------------------------------------------------------------------------------|-------------------------------------------------------------------------------------------------------|------------|
| Saskatoon, SK)                                                      | rats                                                             |                                                  | foci (ACF)                                                                                                                                                                                                                                                                                      |                                                                                                       |            |
| Sigma Aldrich, Saint Quentin Fallavier, France                      | HT-29, HCT-116 cells                                             | 0, 10, 20, 40 µM                                 | increasing cyclooxygenase-2 (COX-2) and 5-lipoxygenase (5-LOX) expression and activity, inducing p38 MAPK pathway activation and subsequent DR5 overexpression                                                                                                                                  | inducing apoptosis                                                                                    | (31,71)    |
| <i>Dioscorea floribunda</i>                                         | Colo-205                                                         | IC50 (27 µM)                                     | arresting cell cycle at G1 phase and activated caspase-3                                                                                                                                                                                                                                        | inducing apoptosis                                                                                    | (53)       |
| Sigma Aldrich (St. Louis, MO, USA                                   | SW1116, RKO                                                      | 10, 20, 40, 80 µM                                | suppressing CRC cells through cAMP/PKA/CREB pathway, modulating p53 and Bcl-2 family proteins expression to mediate mitochondrial apoptosis pathway, reducing MMP-9, mediating glucose transporter (GLUT) like GLUT3 and GLUT4, and pyruvate carboxylase PC downregulation                      | increasing apoptosis, suppressing migration and invasion, decreasing aerobic glycolysis               | (30)       |
| Sigma- Aldrich (St. Louis, MO, USA).<br><i>Dioscorea floribunda</i> | human hepatocellular carcinoma HepG2, SMMC-7721 cells            | 0, 25, 50, 75, 100 µM<br>IC50 (27 µM)            | inhibiting the expression of TAZ (transcriptional co-activator with PDZ binding motif), arresting cell cycle at G1 phase and activating caspase-3, up-regulating DEAD box polypeptide 3 (DDX3), inducing G2/M phase arrest                                                                      | inhibiting cell growth and proliferation, inducing apoptosis, suppressing cell migration and invasion | (17,36,53) |
| Fuzheng<br>Jiedu Xiaoji formulation<br>(FZJDXJ)                     | cell lines BEL7402 and MHCC97H<br><br>Nude mice (BALB/C-A, male) | FZJDXJ serum<br><br>a dose of 0.15 mL (64.6 mg), | through the AKT/CyclinD1/p21/p27 pathways, retarding G1/S transition                                                                                                                                                                                                                            | inhibiting cell proliferation, and promoting cell apoptosis                                           | (99)       |
| Sigma–Aldrich (St. Louis, MO)                                       | human C3A, HepG2, HUH-7                                          | 0, 10, 20, 30, 50, 100 µM                        | inhibiting both constitutive and inducible activation of STAT3, suppressing activation of c-Src, JAK1 and JAK2 implicated in STAT3 activation, inducing the expression of Src homology 2 phosphatase 2 (SH-PTP2), downregulating the expression of various STAT3-regulated gene products        | inhibiting proliferation and potentiating the apoptotic effects                                       | (73)       |
| Sigma                                                               | human HepG2 cell                                                 | 0, 10, 20, 30, 40µM                              | resulting in activation of the caspase-3, -8, -9 and cleavage of poly-ADP-ribose polymerase (PARP) and the release of cytochrome c, increasing the expression of Bax, decreasing the expression of Bid and Bcl-2, and augmenting the Bax/Bcl-2 ratio, generating ROS through activation of ASK1 | inducing apoptosis                                                                                    | (83)       |
| Sigma-Aldrich (St Louis, MO, USA)                                   | Pancreatic cancer Patu8988, Panc-1 cells                         | 0, 25, 50, 75, 100 µM                            | reducing the expression levels of EZH2 and its target Vimentin, promoting PTEN, induced G2/M phase arrest                                                                                                                                                                                       | inducing apoptotic cell death, inhibiting cell migration and                                          | (38)       |

|                                                                                     |                                                     |                                                         |                                                                                                                                                                                                                                             |                                                                             |            |
|-------------------------------------------------------------------------------------|-----------------------------------------------------|---------------------------------------------------------|---------------------------------------------------------------------------------------------------------------------------------------------------------------------------------------------------------------------------------------------|-----------------------------------------------------------------------------|------------|
|                                                                                     |                                                     |                                                         |                                                                                                                                                                                                                                             | invasive capacities                                                         |            |
| \                                                                                   | Human SCC Hep-2                                     | 40 $\mu$ M                                              | caspase-3 dependent with a fall of mitochondrial membrane potential, nuclear localization of AIF and poly (ADP-ribose) polymerase cleavage, inducing p53 activation and cell cycle arrest                                                   | inducing apoptosis, antiproliferative                                       | (66)       |
| fenugreek<br>( <i>Trigonella foenum<br/>graecum</i> )                               | human A431, Hep2 cells,<br>RPMI 2650, HaCat cells   | 2-100 $\mu$ M<br>(IC50) 40 $\mu$ M                      | increasing the sub-G1 population, increasing Bax/Bcl-2 ratio, observing activation of caspases and cleavage of poly ADP ribose polymerase, inhibiting Akt and JNK phosphorylation                                                           | inducing apoptosis, inhibiting cell proliferation                           | (100)      |
|                                                                                     | sarcoma 180 tumor cells in<br>Swiss albino mice     | 20 mg/kg/day                                            | reducing tumor size and tumor mass, decreasing expression of CD31                                                                                                                                                                           | antiangiogenic, antiproliferative functions, apoptosis-promoting            |            |
| Sigma co, <i>foenum-graecum</i><br>Linn (fenugreek),<br><i>Dioscorea floribunda</i> | lung cancer cell line A549                          | 0, 10, 20, 30, 40, 50,<br>60 $\mu$ M, IC50 (27 $\mu$ M) | inhibiting telomerase activity by down-regulation of hTERT gene expression, arresting cell cycle at G1 phase and activating caspase-3                                                                                                       | inhibiting growth of cancer cell, inducing apoptosis                        | (45,53,82) |
| Sigma-Aldrich (St. Louis,<br>MO, USA), <i>Dioscorea<br/>floribunda</i>              | human prostate cancer PC-3<br>cells                 | 0, 25, 50, 75, 100 $\mu$ M<br>IC50 (27 $\mu$ M)         | inhibiting the expression of neural precursor cell expressing developmentally down-regulated protein 4 (NEDD4), arresting cell cycle at G1 phase and activating caspase-3                                                                   | inhibiting cell growth, inducing apoptosis and cell cycle arrest            | (48,53)    |
|                                                                                     |                                                     | 0, 5, 10, 20, 30 $\mu$ M                                | reducing MMPs expression, inhibiting ERK, JNK and PI3K/Akt signaling pathways as well as NF-kB activity                                                                                                                                     | inhibiting migration and invasion                                           | (50)       |
| Nanjing Zelang Medical<br>Technology Co., Ltd.<br>(Nanjing, China)<br>purity >98%   | DU145                                               | 15, 3, 0.6 $\mu$ g/mL                                   | inhibiting the PI3K/Akt/mTOR signaling pathway                                                                                                                                                                                              | activating apoptosis and autophagy                                          | (51)       |
| fenugreek<br>seed, <i>Dioscorea floribunda</i>                                      | human breast cancer cells<br>MCF7, MDA-MB-231 cells | 0, 25, 50, 75, 100<br>$\mu$ M, IC50 (27 $\mu$ M)        | upregulating the expression of p57 and FOXO1, inhibiting the expression of S-phase kinase-associated protein 2(Skp2), arresting cell cycle at G1 phase and activating caspase-3                                                             | inhibiting cell viability and stimulating apoptosis, reducing cell invasion | (53,55)    |
| Sigma-Aldrich (St. Louis,<br>MO, USA).                                              | MCF-7 and Hs578T                                    | 0, 5, 10, 20, 40 $\mu$ M                                | altering phosphorylated cyclin checkpoint1 (p-Chk1Ser345) and cyclin B expression, resulting in G2/M phase blockade, down-regulating the anti-apoptotic protein, Bcl-2, releasing cytochrome c and activating the caspase signaling cascade | mitochondria-mediated apoptosis in cancer cells, affecting cell death       | (56)       |

|                                                                                                                                |                                                          |                                                           |                                                                                                                                                                                                                                                                                                                               |                                                                                  |      |
|--------------------------------------------------------------------------------------------------------------------------------|----------------------------------------------------------|-----------------------------------------------------------|-------------------------------------------------------------------------------------------------------------------------------------------------------------------------------------------------------------------------------------------------------------------------------------------------------------------------------|----------------------------------------------------------------------------------|------|
| <i>Dioscorea composita</i>                                                                                                     | cervical cancer cell lines HeLa and CaSki                | 0-80 $\mu$ M                                              | presenting compact nuclei and apoptotic bodies, positive for active caspase-3                                                                                                                                                                                                                                                 | increasing antiproliferative activity, inducing apoptosis                        | (58) |
| Nanjing Spring & Autumn Biotech Co. Ltd (purity >98%)                                                                          | chronic myeloid leukemia (CML) cell lines K562, BaF 3-WT | 0, 5, 10, 15, 20, 30 $\mu$ M                              | generating ROS, inhibiting mTOR pathway                                                                                                                                                                                                                                                                                       | inducing autophagy and apoptosis                                                 | (65) |
| 1. <i>Solanum lyratum</i> Extracts (Dongpu, Sinyi Township, Nantou County, Taiwan)<br>2.Sigma-Aldrich Corp. (St.Louis, MO,USA) | murine myelomonocytic leukemia cell line (WEHI-3)        | 1.0, 100, 200, 400 $\mu$ g/mL<br>2.0, 25, 50, 100 $\mu$ M | increasing the protein level of p53 and decreasing the protein levels of CDK4, CDK6, and cyclin D, increasing the death receptor pathway-associated Fas/CD95, FasL, FADD, and cleavage-caspase-8 protein levels, increasing cytochrome c, Apaf-1, Bax, Bad, and cleavage-caspase-9, decreasing the levels of Bcl-2 and Bcl-xl | inhibiting cell proliferation, promoting G0/G1 phase arrest, inducing cell death | (64) |
| Solanum lyratum Extracts                                                                                                       | BALB/c mice (4–6 weeks of age)                           | 5, 15 mg/kg                                               | reducing tumor volume                                                                                                                                                                                                                                                                                                         | inhibiting tumor growth                                                          |      |
| <i>Dioscorea floribunda</i>                                                                                                    | Leukaemia Jurkat                                         | IC50 (27 $\mu$ M)                                         | arresting cell cycle at G1 phase and activated caspase-3                                                                                                                                                                                                                                                                      | inducing apoptosis                                                               | (53) |
|                                                                                                                                | Ehrlich ascites carcinoma in mice                        | 50, 75 mg/kg                                              | reducing 54.4% and 65.4% Ehrlich ascites carcinoma in mice                                                                                                                                                                                                                                                                    | inhibiting tumor growth                                                          |      |
| Nanjing Zelang Medical Technology Co., Ltd. (purity >90%)                                                                      | Human osteosarcoma MG63 and U2OS cells                   | MG63 (80 $\mu$ M) and U2OS (40 $\mu$ M)                   | inhibiting the phosphorylated p38 (pP38) protein and the p38MAPK signaling pathway                                                                                                                                                                                                                                            | reducing metastasis                                                              | (68) |
| Nanjing Spring & Autumn Biotech Co., Ltd (purity > 98%)                                                                        | C57BL/6-derived melanoma cell line B16F10                | 0, 10, 15, 20, 25, 30 $\mu$ M                             | inducing cell viability reduction and obvious morphological alteration in cancer cells, eliciting augmented T-cell responses                                                                                                                                                                                                  | inhibiting the growth                                                            | (67) |
|                                                                                                                                | melanoma cells M4Beu                                     | 40 $\mu$ M                                                | caspase-3 dependent with a fall of mitochondrial membrane potential, nuclear localization of AIF and poly (ADP-ribose) polymerase cleavage, inducing p53 activation and cell cycle arrest                                                                                                                                     | inducing apoptosis, antiproliferative                                            | (66) |
| Nanjing Spring & Autumn Biotech Co., Ltd (purity > 98%)                                                                        | C57BL/6 mice melanoma-bearing                            | 20 mg/kg, 0.2 mL                                          | CD4+/CD8+ T-cell infiltration and IFN- $\gamma$ expression in tumor tissues, improving the compositions of intestinal microbiota                                                                                                                                                                                              | triggering tumor necrosis, apoptosis, and activation of antitumor immunity       | (67) |

|                                    |                                                                                  |                           |                                                                                                                                                                                                                                                                                                                                 |      |
|------------------------------------|----------------------------------------------------------------------------------|---------------------------|---------------------------------------------------------------------------------------------------------------------------------------------------------------------------------------------------------------------------------------------------------------------------------------------------------------------------------|------|
| Sigma Aldrich (St. Louis, MO, USA) | human CCA cell lines<br>HuCCT1, QBC939,<br>SK-ChA-1, HuH28, RBE, and<br>Mz-ChA-1 | 0, 10, 20, 40, 80 $\mu$ M | decreasing the expression of mitosis-promoting factor cyclinB1<br>along with the elevating level of cell cycle inhibitor p21,<br>resulting in arresting CCA cell cycles at G2/M phase, inducing apoptosis<br>cleaved-caspase-3, cleaved-PARP1 and the Bax/Bcl-2 ratio,<br>increasing expressions of cytosol cytochrome <i>c</i> | (39) |
|                                    | Nude mice (BALB/c)                                                               | 50 mg/kg                  | down-regulating PCNA and Ki67 protein expression<br>inhibiting tumor growth                                                                                                                                                                                                                                                     |      |

## Appendix 2. Clinical applications of diosgenin in different cancers.

| Source                                                         | Cases                                                                                                                                                                                                                                                        | Age<br>(year) | Formula                                                                                                                                                                                                                                                                                                          | Dose                                                                                               | Results                                                                                                                                                                                                                              | References |
|----------------------------------------------------------------|--------------------------------------------------------------------------------------------------------------------------------------------------------------------------------------------------------------------------------------------------------------|---------------|------------------------------------------------------------------------------------------------------------------------------------------------------------------------------------------------------------------------------------------------------------------------------------------------------------------|----------------------------------------------------------------------------------------------------|--------------------------------------------------------------------------------------------------------------------------------------------------------------------------------------------------------------------------------------|------------|
| Fuzheng<br>Jiedu Xiaoji<br>formulation<br>(FZJDXJ)             | 291 HCC patients                                                                                                                                                                                                                                             | 54.45         | Codonopsis pilosula (15g), Poria cocos (15g),<br>Astragalus membranaceus (15g), Atractylodes<br>macrocephala (15g), Angelica sinensis (15g),<br>Adenophora stricta (15g), Radix<br>ophiopogonis (15g), Rehmannia glutinosa (15g),<br>Paris polyphylla (15g), Curcuma phaeocaulis<br>(15g), Pinellia ternata (9g) | 300 ml of the herb<br>concoction, one<br>dose granule of<br>FZJDXJ was<br>added to 150 mL<br>herbs | prolonging OS and PFS, reducing<br>the mortality rate of HCC patients                                                                                                                                                                | (99)       |
| Chinese<br>herbal extract,<br>specifications:<br>200mg/ slice  | cervical cancer (n=1), esophageal<br>cancer (n=1), lung cancer (n=10),<br>bladder cancer (n=1), breast cancer<br>(n=9), lymphoma (n=3), liver cancer<br>(n=2), stomach cancer (n=2), kidney<br>cancer (n=1), cholangiocarcinoma<br>(n=1), bowel cancer (n=3) | 38~60         | containing 200 mg of diosgenin                                                                                                                                                                                                                                                                                   | 400, 800, 1400,<br>2000, 2600 mg                                                                   | There were no adverse events in<br>the single administration group of<br>diosgenin, while in the continuous<br>dose group of 2000 mg, there were<br>1/6 subjects with abnormal liver<br>function and could recover by<br>themselves. | (104)      |
| Chinese<br>herbal extract,<br>specifications:<br>200mg/ tablet | Breast cancer (n=3), lung cancer (n=3),<br>rectal cancer (n=2), cervical cancer<br>(n=2), malignant transformation (n=2),<br>renal cell carcinoma (n=2), gastric                                                                                             | 36~68         | containing 200 mg of diosgenin                                                                                                                                                                                                                                                                                   | 600, 1200, 2400<br>mg                                                                              | Diosgenin has poor oral absorption<br>rate (about 5 h to peak) and long<br>$t_{1/2}$ (average 30 h), Prototype<br>plasma                                                                                                             | (103)      |

|                       |                                                                                                                                                                                                                                                                                                                                             |       |                                                                                                                                                                                                                                                  |                                                                                  |                                                                                                                                                                                                                                                                                         |
|-----------------------|---------------------------------------------------------------------------------------------------------------------------------------------------------------------------------------------------------------------------------------------------------------------------------------------------------------------------------------------|-------|--------------------------------------------------------------------------------------------------------------------------------------------------------------------------------------------------------------------------------------------------|----------------------------------------------------------------------------------|-----------------------------------------------------------------------------------------------------------------------------------------------------------------------------------------------------------------------------------------------------------------------------------------|
|                       | cancer (n=2), prostate cancer (n=2), lymphoma (n=2), nodular thyroid tumor (n=1), thyroid cancer (n=1), uterine cancer (n=1) brain tumor (n=1).                                                                                                                                                                                             |       |                                                                                                                                                                                                                                                  |                                                                                  | concentration is not high. Bioavailability decreased after taking diosgenin of the high dose, the single oral of 1200 mg to 2400mg showed the process of nonlinear dynamics. The single oral of 600mg to 2400mg has good security in clinical.                                          |
| Shenlingbaizhu powder | lung cancer (n=29), bowel cancer (n=12), gastric cancer (n=7), cervical cancer (n=3), prostate cancer (n=2), pancreatic cancer (n=2), ovarian cancer (n=1), endometrial cancer (n=1), kidney cancer (n=1), liver cancer (n=1), glioma (n=1), fibrosarcoma (n=1), gallbladder cancer (n=1), cholangiocarcinoma (n=1), multiple myeloma (n=1) | 35~75 | Raw ginseng (20 g), Poria cocos (20 g), fried Baizhu (20 g), fried White lentil (15 g), Coicis seed (10 g), Chinese yam (20 g), fructus amomi (10 g), platycodon grandiflorum (10 g), lotus seed (10 g), roasted licorice (20 g), red date (5 g) | 1 dose a day, divided into 3 times of warm administration, treatment for 4 weeks | Shenlingbaizhu powder combined with nutritional support can improve life quality and KPS, decrease TNF- $\alpha$ , TWEAK, Fn14 expression of the tumor cachexia patient. Shenlingbaizhu powder control cancer cachexia maybe due to its regulation of these cytokines. <sup>(101)</sup> |
